# Supplementary material
Source: MDPI journal article supplement (https://www.mdpi.com/2073-4344/13/5/868)
Supplement: s1 [file s1]

## Supplementary Materials:

# Effect of the preparation method on Cu-MOR/g-C<sub>3</sub>N<sub>4</sub> for direct methanol synthesis from methane oxidation by photothermal catalysis

Jun-Cai Hao <sup>1,2</sup>, Rui-Xin Zhang <sup>3,4</sup>, Miao Ren <sup>3,4</sup>, Jia-Xuan Zhao <sup>5</sup>, Zhi-Hua Gao <sup>3,4</sup>, Lei Liu <sup>4</sup>, Zhu-Xia Zhang <sup>1,2,\*</sup> and Zhi-Jun Zuo <sup>3,4,\*</sup>

<sup>1</sup> College of Chemistry, Taiyuan University of Technology, Taiyuan 030024, China; juncai\_hao@163.com

<sup>2</sup> College of Materials Science and Engineering, Taiyuan University of Technology, Taiyuan 030024, China

<sup>3</sup> State Key Laboratory of Clean and Efficient Coal Utilization, Taiyuan University of Technology, Taiyuan 030024, China; zhangruixin0659@link.tyut.edu.cn (R.-X.Z.); renmiao\_happy@126.com (M.R.); gaozhihua@tyut.edu.cn (Z.-H.G.)

<sup>4</sup> College of Chemical Engineering and Technology, Taiyuan University of Technology, Taiyuan 030024, China; liulei@tyut.edu.cn

<sup>5</sup> College of Software, Taiyuan University of Technology, Taiyuan 030024, China; zhaojiaxuan5642@link.tyut.edu.cn

\* Correspondence: zhangzhuxia@tyut.edu.cn (Z.-X.Z.); zuozhijun@tyut.edu.cn (Z.-J.Z.)

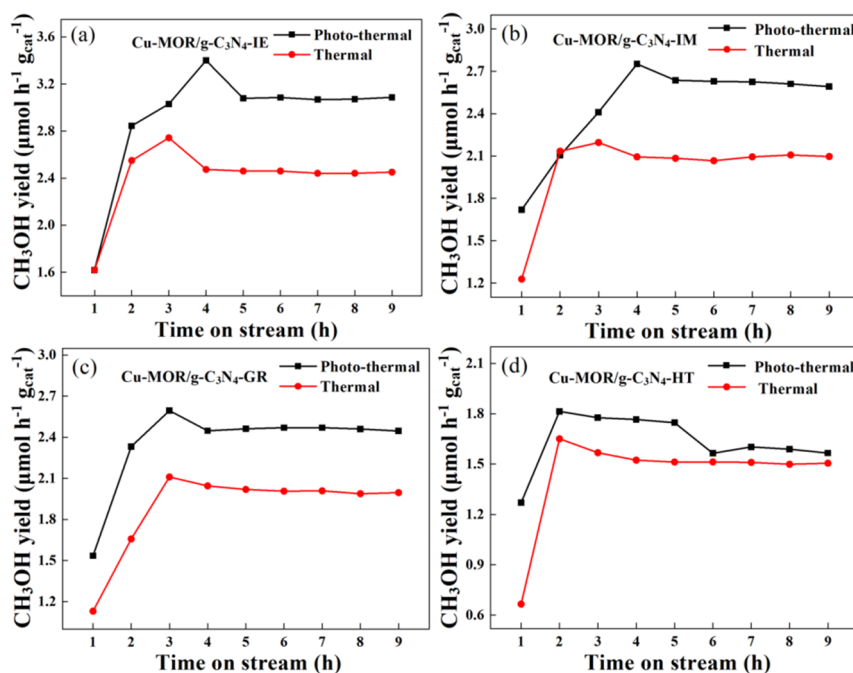

**Figure S1.** Methanol yield of Cu-MOR/g-C<sub>3</sub>N<sub>4</sub> prepared by different methods by photothermal catalysis and thermal catalysis.

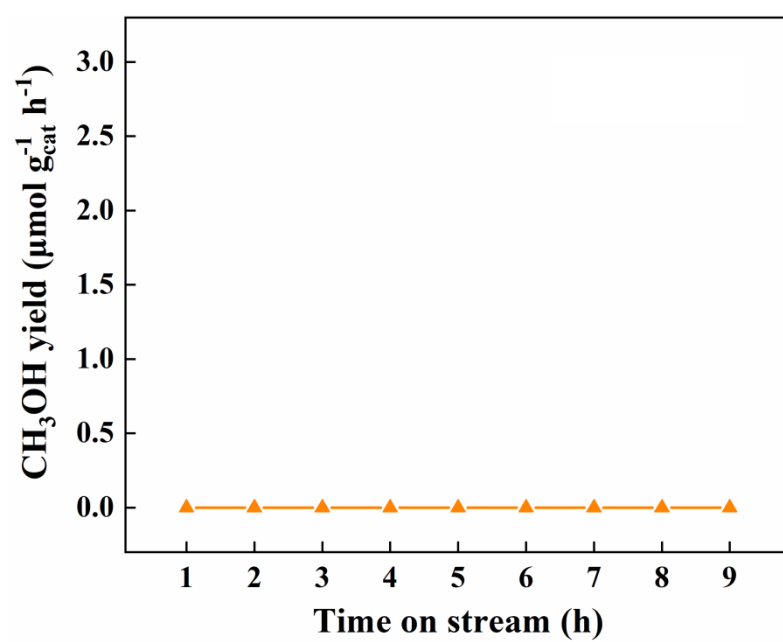

**Figure S2.** CH<sub>3</sub>OH yield on Cu-MOR/g-C<sub>3</sub>N<sub>4</sub>-IE by photo catalysis.

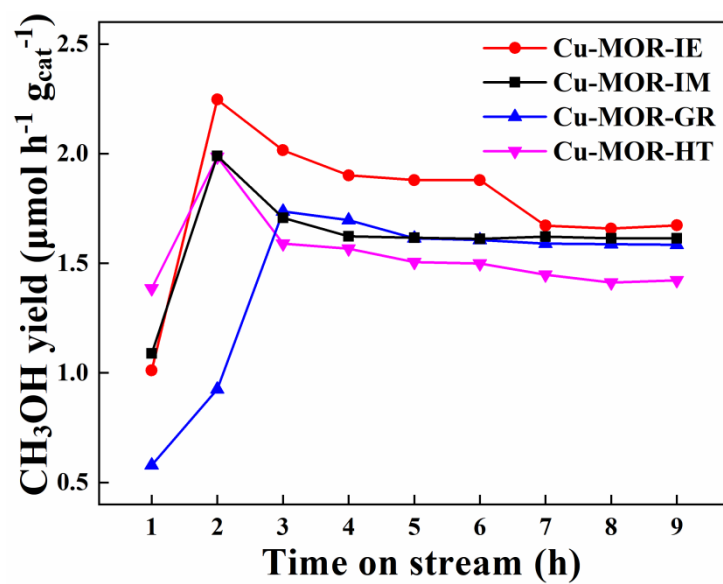

Figure S3. Methanol yield of Cu-MOR prepared by different methods by thermal catalysis.

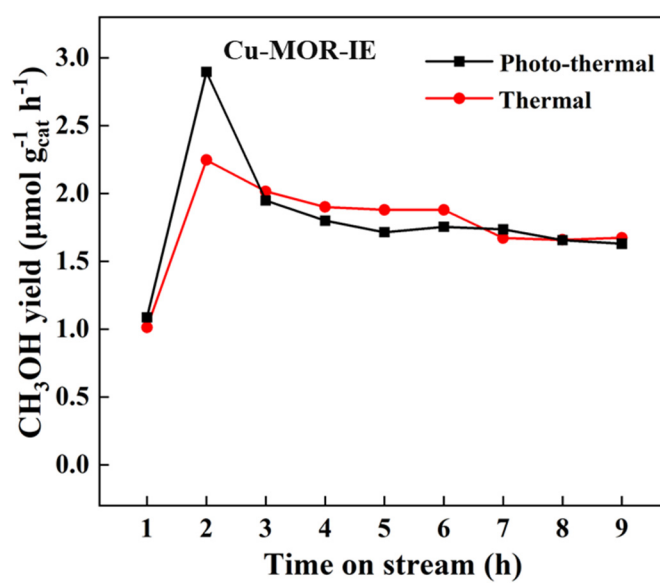

Figure S4. Methanol yield of Cu-MOR-IE by photothermal catalysis and thermal catalysis.

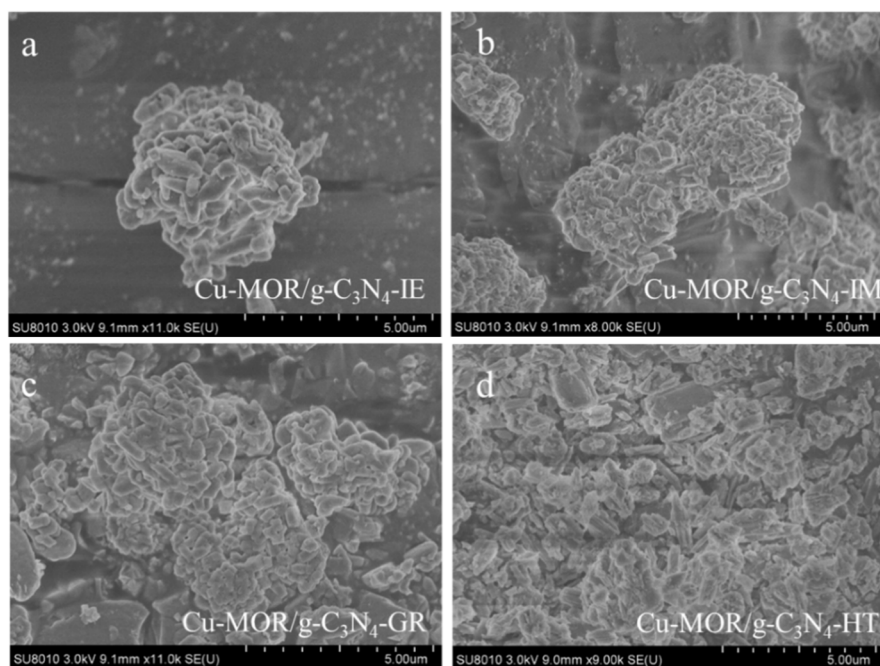

**Figure S5.** SEM of Cu-MOR/g-C<sub>3</sub>N<sub>4</sub> with different preparation methods.

**Table S1.** Fitted EIS results of Cu-MOR/g-C<sub>3</sub>N<sub>4</sub> with different preparation methods based on the equivalent circuit.

| Catalyst                                   | $R_{ct} (\times 10^5 \Omega)$ | $R_s (\Omega)$ | CPE ( $F \cdot cm^{-2}$ ) |
|--------------------------------------------|-------------------------------|----------------|---------------------------|
| Cu-MOR/g-C <sub>3</sub> N <sub>4</sub> -IE | 0.41                          | 69.17          | 0.89                      |
| Cu-MOR/g-C <sub>3</sub> N <sub>4</sub> -IM | 0.93                          | 1.72           | 0.92                      |
| Cu-MOR/g-C <sub>3</sub> N <sub>4</sub> -GR | 2.06                          | 115.80         | 0.87                      |
| Cu-MOR/g-C <sub>3</sub> N <sub>4</sub> -HT | 4.47                          | 113.40         | 0.85                      |
